# Supplementary material for: Predictors of suboptimal adherence to isoniazid preventive therapy among adolescents and children living with HIV
Source: PubMed Central journal article supplement (PMC7746166; doi:10.1371/journal.pone.0243713), 2020-12-17
Supplement: pone.0243713.s001.pdf [file pone.0243713.s001.pdf]

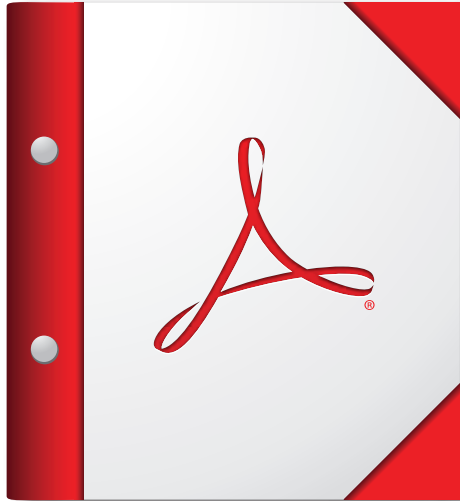

**For the best experience, open this PDF portfolio in  
Acrobat X or Adobe Reader X, or later.**

[Get Adobe Reader Now!](#)
